# Supplementary material for: Evidence of a dysregulated vitamin D endocrine system in SARS-CoV-2 infected patient’s lung cells
Source: PubMed Central journal article supplement (PMC8060306; doi:10.1038/s41598-021-87703-z), 2021-04-21
Supplement: 41598_2021_87703_MOESM1_ESM.pdf [file 41598_2021_87703_MOESM1_ESM.pdf]

## SUPPLEMENTARY TABLES AND FIGURE

### **Evidence of a dysregulated Vitamin D Endocrine System in SARS-CoV-2 infected patient's lung cells**

Bijesh George<sup>1,2</sup>, Revikumar Amjesh<sup>1</sup>, Aswathy Mary Paul<sup>1,2</sup>, T. R. Santhoshkumar<sup>1</sup>,  
Madhavan Radhakrishna Pillai<sup>3</sup> and Rakesh Kumar<sup>1,4,5</sup>

<sup>1</sup>Cancer Research Program, Rajiv Gandhi Centre for Biotechnology, Trivandrum, INDIA.

<sup>2</sup>PhD Program, Manipal Academy of Higher Education (MAHE), Manipal, INDIA

<sup>3</sup>Pathogen Biology Program, Rajiv Gandhi Centre for Biotechnology, Trivandrum, INDIA.

<sup>4</sup>Department of Medicine, Division of Hematology/Oncology, Rutgers New Jersey Medical School, Newark, USA.

<sup>5</sup>Department of Human and Molecular Genetics, Virginia Commonwealth University, School of Medicine, Richmond, USA.

**Supplementary Table 1:** The expression profile of Vitamin D components from SARS-CoV2 infected patient samples when compared to its healthy controls and when the analysis performed in A549, NHBE and Calu3 cell lines

**Supplementary Table 2:** Results of Gene Ontology analysis of 43 genes specifically for COVID19 functional enrichment using Metascape.

**Supplementary Table 3:** Results of Gene Ontology analysis of 43 using Metascape.

**Supplementary Table 4:** Functional enrichment analysis of 12 down regulated genes and its network genes using Reactome.

**Supplementary Table 5:** Functional enrichment analysis of 19 up-regulated genes and its network genes using Reactome.

**Supplementary Figure 1:** Expression status of 43 share genes identified in Figure 3e in three independent validation datasets from SARS-CoV2 infected patient specimens

|                                                                              | Lung (BALF) | Healthy Lung Biopsy vs COVID19 Lung | SARS2 to Healthy | NHBE Mock vs SARCoV2 | A549 Mock vs SARCoV2 | A549 Mock vs SARCoV2 | Calu3 Mock vs SARCoV2 |
|------------------------------------------------------------------------------|-------------|-------------------------------------|------------------|----------------------|----------------------|----------------------|-----------------------|
| <b>Vitamin D component genes</b>                                             |             |                                     |                  |                      |                      |                      |                       |
| RXRA                                                                         | -2.29       |                                     |                  |                      |                      |                      |                       |
| VDR                                                                          | -1.85       |                                     |                  |                      |                      | 1.45                 | 0.73                  |
| CYP27B1                                                                      |             |                                     |                  | 1.28                 |                      |                      |                       |
| CYP24A1                                                                      |             | 4.38                                |                  |                      |                      | 0.73                 |                       |
| CYP27A1                                                                      | -2.57       |                                     | -2.81            |                      |                      |                      |                       |
| FGFR1                                                                        |             | -3.02                               | -3.34            |                      |                      | -0.96                | -0.44                 |
| FGFR2                                                                        | 6.76        |                                     |                  | -0.38                |                      | -2.46                | -0.54                 |
| FGFR3                                                                        |             |                                     |                  | -0.37                |                      | -2.03                | -1.64                 |
| FGFR4                                                                        |             |                                     |                  |                      |                      | -2.65                | -0.97                 |
| * A cut-off of 1.5 foldchange (log2FC .58) is not applied for the above data |             |                                     |                  |                      |                      |                      |                       |
| <b>8 representative molecules</b>                                            |             |                                     |                  |                      |                      |                      |                       |
| ABCB4                                                                        |             |                                     |                  |                      |                      |                      |                       |
| ABCD2                                                                        |             |                                     |                  |                      |                      |                      |                       |
| ACSL1                                                                        | -0.76       | 3.47                                |                  |                      |                      |                      | 0.78                  |
| ACVR1B                                                                       | -1.57       |                                     |                  |                      |                      |                      |                       |
| SCNN1a                                                                       | 2.56        |                                     | 4.44             |                      |                      | -0.88                |                       |
| OPN                                                                          |             |                                     |                  |                      |                      |                      |                       |
| CD44                                                                         | -0.88       |                                     |                  |                      |                      | 0.69                 |                       |
| ITGB3                                                                        |             | -4.51                               |                  | 1.21                 |                      | 2.77                 |                       |
| <b>Vitamin D regulated genes in coagulation</b>                              |             |                                     |                  |                      |                      |                      |                       |
| PLAU                                                                         | -2.35       |                                     |                  |                      |                      | 1.70                 | 1.25                  |
| PLAT                                                                         | 4.29        |                                     |                  | 1.41                 |                      |                      | 2.46                  |
| TFPI                                                                         | 5.24        |                                     |                  |                      |                      | 1.44                 | 0.67                  |
| THBD                                                                         | -4.13       |                                     |                  | -0.98                |                      |                      | 2.33                  |
| F3                                                                           | 3.70        |                                     | 3.07             |                      |                      | 1.53                 | 1.80                  |
| SERPINB2                                                                     | 9.15        |                                     | 4.59             | 0.69                 |                      |                      | 2.34                  |
| PROS                                                                         |             |                                     |                  |                      |                      |                      |                       |

**Supplementary Table 1:** The expression profile of Vitamin D components from SARS-CoV2 infected patient samples when compared to its healthy controls and when the analysis performed in A549, NHBE and Calu3 cell lines

| GO       | Description                                  | Count | %   | Log10(P) | Log10(q) |
|----------|----------------------------------------------|-------|-----|----------|----------|
| COVID017 | RNA_Blanco-Melo_Lung_Down                    | 10    | 23  | -11      | -6.7     |
| COVID255 | RNA_Wilk_CD14+Monocytes_patient-C5_Down      | 5     | 12  | -5.5     | -1.5     |
| COVID249 | RNA_Wilk_CD14+Monocytes_patient-C2_Down      | 4     | 9.3 | -5.5     | -1.5     |
| COVID352 | RNA_Zhang_Monocytes_moderate-only_Up         | 3     | 7   | -5.1     | -1.3     |
| COVID257 | RNA_Wilk_CD14+Monocytes_patient-C6_Down      | 4     | 9.3 | -5       | -1.3     |
| COVID011 | RNA_Blanco-Melo_A549-ACE2-ruxolitinib_Down   | 5     | 12  | -4.5     | -1.1     |
| COVID273 | RNA_Wilk_Dendritic-cells_patient-C1A-mild_Up | 3     | 7   | -4.5     | -1.1     |
| COVID016 | RNA_Blanco-Melo_Calu-3_Up                    | 5     | 12  | -4       | -0.89    |
| COVID032 | RNA_Liao_BALF-severe_Up                      | 5     | 12  | -4       | -0.89    |
| COVID048 | RNA_Wyler_Calu-3_12h_Up                      | 5     | 12  | -4       | -0.89    |
| COVID251 | RNA_Wilk_CD14+Monocytes_patient-C3_Down      | 3     | 7   | -3.9     | -0.86    |
| COVID252 | RNA_Wilk_CD14+Monocytes_patient-C4_Up        | 3     | 7   | -3.6     | -0.63    |
| COVID244 | RNA_Wilk_CD14+Monocytes_patient-C1A-mild_Up  | 3     | 7   | -3.6     | -0.63    |
| COVID253 | RNA_Wilk_CD14+Monocytes_patient-C4_Down      | 3     | 7   | -3.3     | -0.46    |
| COVID254 | RNA_Wilk_CD14+Monocytes_patient-C5_Up        | 3     | 7   | -3.2     | -0.44    |
| COVID209 | Proteome_Li_Urine-recovery-vs-healthy_Down   | 3     | 7   | -3       | -0.32    |
| COVID353 | RNA_Zhang_Monocytes_severe-and-moderate_Up   | 3     | 7   | -3       | -0.32    |
| COVID193 | RNA_Stukalov_A549-ACE2_30h_Up                | 4     | 9.3 | -3       | -0.3     |
| COVID051 | RNA_Xiong_BALF_Down                          | 4     | 9.3 | -2.9     | -0.3     |
| COVID010 | RNA_Blanco-Melo_A549-ACE2_Up                 | 4     | 9.3 | -2.9     | -0.3     |

**Supplementary Table 2:** Results of oene ontology analysis of 43 genes specifically for COVID19 datasets using Metascape.

| GO            | Category                | Description                                                | Count | %    | Log10(P) | Log10(q) |
|---------------|-------------------------|------------------------------------------------------------|-------|------|----------|----------|
| R-HSA-6798695 | Reactome Gene Sets      | Neutrophil degranulation                                   | 8     | 18.6 | -6.22    | -2.46    |
| GO:0043900    | GO Biological Processes | regulation of multi-organism process                       | 7     | 16.3 | -5.42    | -2.12    |
| GO:0043065    | GO Biological Processes | positive regulation of apoptotic process                   | 8     | 18.6 | -5.07    | -1.87    |
| ko04142       | KEGG Pathway            | Lysosome                                                   | 4     | 9.3  | -4.42    | -1.42    |
| GO:0010951    | GO Biological Processes | negative regulation of endopeptidase activity              | 5     | 11.6 | -4.33    | -1.39    |
| hsa05169      | KEGG Pathway            | Epstein-Barr virus infection                               | 5     | 11.6 | -4.03    | -1.18    |
| GO:0007159    | GO Biological Processes | leukocyte cell-cell adhesion                               | 5     | 11.6 | -3.63    | -0.83    |
| GO:0010959    | GO Biological Processes | regulation of metal ion transport                          | 5     | 11.6 | -3.47    | -0.71    |
| GO:0051640    | GO Biological Processes | organelle localization                                     | 6     | 14   | -3.06    | -0.44    |
| GO:0008277    | GO Biological Processes | regulation of G protein-coupled receptor signaling pathway | 3     | 6.98 | -2.75    | -0.22    |
| ko04621       | KEGG Pathway            | NOD-like receptor signaling pathway                        | 3     | 6.98 | -2.64    | -0.15    |
| GO:0007015    | GO Biological Processes | actin filament organization                                | 4     | 9.3  | -2.35    | 0        |

**Supplementary Table 3:** Results of Gene Ontology analysis of 43 using Metascape.

|    | <b>Pathway</b>                                                      | <b>Total</b> | <b>Expected</b> | <b>Hits</b> | <b>P.Value</b> | <b>FDR</b> |
|----|---------------------------------------------------------------------|--------------|-----------------|-------------|----------------|------------|
| 1  | Regulation of activated PAK-2p34 by proteasome mediated degradation | 48           | 2.49            | 37          | 5.56E-39       | 7.79E-36   |
| 2  | CDK-mediated phosphorylation and removal of Cdc6                    | 49           | 2.54            | 37          | 2.17E-38       | 1.52E-35   |
| 3  | Vpu mediated degradation of CD4                                     | 50           | 2.59            | 37          | 7.96E-38       | 3.72E-35   |
| 4  | Stabilization of p53                                                | 54           | 2.8             | 38          | 1.92E-37       | 5.38E-35   |
| 5  | Destabilization of mRNA by AUF1 (hnRNP D0)                          | 54           | 2.8             | 38          | 1.92E-37       | 5.38E-35   |
| 6  | Activation of NF-kappaB in B Cells                                  | 66           | 3.42            | 41          | 6.27E-37       | 1.47E-34   |
| 7  | p53-Dependent G1/S DNA damage checkpoint                            | 59           | 3.06            | 39          | 9.82E-37       | 1.72E-34   |
| 8  | p53-Dependent G1 DNA Damage Response                                | 59           | 3.06            | 39          | 9.82E-37       | 1.72E-34   |
| 9  | Ubiquitin-dependent degradation of Cyclin D1                        | 49           | 2.54            | 36          | 1.26E-36       | 1.77E-34   |
| 10 | Ubiquitin-dependent degradation of Cyclin D                         | 49           | 2.54            | 36          | 1.26E-36       | 1.77E-34   |
| 11 | Autodegradation of the E3 ubiquitin ligase COP1                     | 53           | 2.75            | 37          | 2.90E-36       | 3.69E-34   |
| 12 | Degradation of beta-catenin by the destruction complex              | 65           | 3.37            | 40          | 8.43E-36       | 9.09E-34   |
| 13 | Signaling by Wnt                                                    | 65           | 3.37            | 40          | 8.43E-36       | 9.09E-34   |
| 14 | G1/S DNA Damage Checkpoints                                         | 62           | 3.21            | 39          | 1.82E-35       | 1.83E-33   |
| 15 | Ubiquitin Mediated Degradation of Phosphorylated Cdc25A             | 52           | 2.69            | 36          | 4.32E-35       | 3.57E-33   |
| 16 | p53-Independent DNA Damage Response                                 | 52           | 2.69            | 36          | 4.32E-35       | 3.57E-33   |
| 17 | p53-Independent G1/S DNA damage checkpoint                          | 52           | 2.69            | 36          | 4.32E-35       | 3.57E-33   |
| 18 | SCF-beta-TrCP mediated degradation of Emil                          | 53           | 2.75            | 36          | 1.29E-34       | 1.00E-32   |
| 19 | Cross-presentation of soluble exogenous antigens (endosomes)        | 48           | 2.49            | 34          | 1.00E-33       | 7.14E-32   |
| 20 | Vif-mediated degradation of APOBEC3G                                | 55           | 2.85            | 36          | 1.02E-33       | 7.14E-32   |
| 21 | Regulation of Apoptosis                                             | 59           | 3.06            | 37          | 1.32E-33       | 8.83E-32   |
| 22 | Regulation of ornithine decarboxylase (ODC)                         | 49           | 2.54            | 34          | 3.12E-33       | 1.99E-31   |
| 23 | CDT1 association with the CDC6:ORC:origin complex                   | 57           | 2.95            | 36          | 7.05E-33       | 4.30E-31   |
| 24 | SCF(Skp2)-mediated degradation of p27/p21                           | 58           | 3.01            | 36          | 1.77E-32       | 1.04E-30   |
| 25 | ER-Phagosome pathway                                                | 63           | 3.26            | 37          | 4.38E-32       | 2.45E-30   |
| 26 | Regulation of mRNA Stability by Proteins that Bind AU-rich Elements | 88           | 4.56            | 42          | 2.52E-31       | 1.36E-29   |
| 27 | Assembly of the pre-replicative complex                             | 63           | 3.26            | 36          | 1.22E-30       | 6.35E-29   |
| 28 | Switching of origins to a post-replicative state                    | 69           | 3.58            | 37          | 4.38E-30       | 2.12E-28   |
| 29 | Orc1 removal from chromatin                                         | 69           | 3.58            | 37          | 4.38E-30       | 2.12E-28   |
| 30 | Cyclin E associated events during G1/S transition                   | 65           | 3.37            | 36          | 5.71E-30       | 2.67E-28   |
| 31 | Cyclin A:Cdk2-associated events at S phase entry                    | 66           | 3.42            | 36          | 1.20E-29       | 5.42E-28   |
| 32 | Removal of licensing factors from origins                           | 71           | 3.68            | 37          | 1.77E-29       | 7.51E-28   |
| 33 | Regulation of DNA replication                                       | 71           | 3.68            | 37          | 1.77E-29       | 7.51E-28   |
| 34 | APC/C:Cdc20 mediated degradation of                                 | 71           | 3.68            | 36          | 3.81E-28       | 1.57E-26   |

|    |                                                                                                          |      |      |     |          |          |
|----|----------------------------------------------------------------------------------------------------------|------|------|-----|----------|----------|
|    | Securin                                                                                                  |      |      |     |          |          |
| 35 | Autodegradation of Cdh1 by Cdh1:APC/C                                                                    | 68   | 3.52 | 35  | 1.11E-27 | 4.45E-26 |
| 36 | Antigen processing-Cross presentation                                                                    | 78   | 4.04 | 37  | 1.50E-27 | 5.84E-26 |
| 37 | DNA Replication Pre-Initiation                                                                           | 80   | 4.15 | 37  | 4.78E-27 | 1.76E-25 |
| 38 | M/G1 Transition                                                                                          | 80   | 4.15 | 37  | 4.78E-27 | 1.76E-25 |
| 39 | Apoptosis                                                                                                | 158  | 8.19 | 50  | 5.44E-27 | 1.96E-25 |
| 40 | Cdc20:Phospho-APC/C mediated degradation of Cyclin A                                                     | 76   | 3.94 | 36  | 8.46E-27 | 2.83E-25 |
| 41 | APC/C:Cdh1 mediated degradation of Cdc20 and other APC/C:Cdh1 targeted proteins in late mitosis/early G1 | 76   | 3.94 | 36  | 8.46E-27 | 2.83E-25 |
| 42 | APC/C:Cdc20 mediated degradation of mitotic proteins                                                     | 76   | 3.94 | 36  | 8.46E-27 | 2.83E-25 |
| 43 | Activation of APC/C and APC/C:Cdc20 mediated degradation of mitotic proteins                             | 77   | 3.99 | 36  | 1.52E-26 | 4.95E-25 |
| 44 | Regulation of APC/C activators between G1/S and early anaphase                                           | 84   | 4.35 | 37  | 4.29E-26 | 1.37E-24 |
| 45 | Downstream Signaling Events Of B Cell Receptor (BCR)                                                     | 173  | 8.96 | 51  | 6.84E-26 | 2.13E-24 |
| 46 | Metabolism of RNA                                                                                        | 339  | 17.6 | 71  | 7.01E-26 | 2.14E-24 |
| 47 | Metabolism of mRNA                                                                                       | 317  | 16.4 | 68  | 2.07E-25 | 6.17E-24 |
| 48 | APC/C-mediated degradation of cell cycle proteins                                                        | 89   | 4.61 | 37  | 5.43E-25 | 1.55E-23 |
| 49 | Regulation of mitotic cell cycle                                                                         | 89   | 4.61 | 37  | 5.43E-25 | 1.55E-23 |
| 50 | Synthesis of DNA                                                                                         | 95   | 4.92 | 38  | 6.60E-25 | 1.85E-23 |
| 51 | Signaling by the B Cell Receptor (BCR)                                                                   | 199  | 10.3 | 53  | 1.54E-24 | 4.22E-23 |
| 52 | Host Interactions of HIV factors                                                                         | 141  | 7.31 | 45  | 1.65E-24 | 4.44E-23 |
| 53 | Disease                                                                                                  | 945  | 49   | 121 | 8.38E-24 | 2.22E-22 |
| 54 | DNA Replication                                                                                          | 102  | 5.29 | 38  | 1.42E-23 | 3.68E-22 |
| 55 | G1/S Transition                                                                                          | 113  | 5.86 | 38  | 1.01E-21 | 2.57E-20 |
| 56 | Immune System                                                                                            | 1140 | 59   | 131 | 1.31E-21 | 3.28E-20 |
| 57 | S Phase                                                                                                  | 122  | 6.32 | 39  | 2.31E-21 | 5.69E-20 |
| 58 | HIV Infection                                                                                            | 214  | 11.1 | 51  | 3.05E-21 | 7.37E-20 |
| 59 | Cell Cycle Checkpoints                                                                                   | 131  | 6.79 | 40  | 4.66E-21 | 1.11E-19 |
| 60 | M Phase                                                                                                  | 233  | 12.1 | 52  | 2.91E-20 | 6.80E-19 |
| 61 | Separation of Sister Chromatids                                                                          | 186  | 9.64 | 46  | 6.47E-20 | 1.49E-18 |
| 62 | Mitotic Anaphase                                                                                         | 198  | 10.3 | 47  | 1.54E-19 | 3.48E-18 |
| 63 | Mitotic Metaphase and Anaphase                                                                           | 199  | 10.3 | 47  | 1.93E-19 | 4.29E-18 |
| 64 | Adaptive Immune System                                                                                   | 654  | 33.9 | 90  | 2.88E-19 | 6.30E-18 |
| 65 | Mitotic G1-G1/S phases                                                                                   | 140  | 7.25 | 39  | 5.71E-19 | 1.23E-17 |
| 66 | Mitotic M-M/G1 phases                                                                                    | 266  | 13.8 | 53  | 2.77E-18 | 5.88E-17 |
| 67 | Ribosomal scanning and start codon recognition                                                           | 91   | 4.72 | 29  | 4.31E-16 | 9.03E-15 |
| 68 | Translation initiation complex formation                                                                 | 92   | 4.77 | 29  | 6.01E-16 | 1.24E-14 |
| 69 | Activation of the mRNA upon binding of the cap-binding complex and eIFs, and subsequent binding to 43S   | 93   | 4.82 | 29  | 8.33E-16 | 1.69E-14 |
| 70 | Antigen processing: Ubiquitination & Proteasome degradation                                              | 224  | 11.6 | 45  | 9.32E-16 | 1.87E-14 |
| 71 | Cell Cycle                                                                                               | 508  | 26.3 | 71  | 1.91E-15 | 3.77E-14 |

|     |                                                                              |      |      |     |          |          |
|-----|------------------------------------------------------------------------------|------|------|-----|----------|----------|
| 72  | Formation of the ternary complex, and subsequently, the 43S complex          | 83   | 4.3  | 27  | 2.60E-15 | 5.06E-14 |
| 73  | Gene Expression                                                              | 1090 | 56.3 | 112 | 2.10E-14 | 4.04E-13 |
| 74  | Class I MHC mediated antigen processing & presentation                       | 267  | 13.8 | 47  | 4.14E-14 | 7.84E-13 |
| 75  | Cell Cycle, Mitotic                                                          | 411  | 21.3 | 60  | 6.03E-14 | 1.13E-12 |
| 76  | GTP hydrolysis and joining of the 60S ribosomal subunit                      | 201  | 10.4 | 38  | 1.43E-12 | 2.57E-11 |
| 77  | 3' -UTR-mediated translational regulation                                    | 201  | 10.4 | 38  | 1.43E-12 | 2.57E-11 |
| 78  | L13a-mediated translational silencing of Ceruloplasmin expression            | 201  | 10.4 | 38  | 1.43E-12 | 2.57E-11 |
| 79  | Formation of a pool of free 40S subunits                                     | 189  | 9.79 | 36  | 4.61E-12 | 8.18E-11 |
| 80  | Eukaryotic Translation Initiation                                            | 209  | 10.8 | 38  | 5.04E-12 | 8.72E-11 |
| 81  | Cap-dependent Translation Initiation                                         | 209  | 10.8 | 38  | 5.04E-12 | 8.72E-11 |
| 82  | Metabolism of amino acids and derivatives                                    | 190  | 9.85 | 36  | 5.42E-12 | 9.27E-11 |
| 83  | Membrane Trafficking                                                         | 203  | 10.5 | 37  | 9.09E-12 | 1.54E-10 |
| 84  | TRAF6 Mediated Induction of proinflammatory cytokines                        | 62   | 3.21 | 18  | 1.07E-09 | 1.79E-08 |
| 85  | Translation                                                                  | 249  | 12.9 | 38  | 1.09E-09 | 1.79E-08 |
| 86  | MyD88:Mal cascade initiated on plasma membrane                               | 81   | 4.2  | 20  | 2.91E-09 | 4.59E-08 |
| 87  | Toll Like Receptor TLR1:TLR2 Cascade                                         | 81   | 4.2  | 20  | 2.91E-09 | 4.59E-08 |
| 88  | Toll Like Receptor TLR6:TLR2 Cascade                                         | 81   | 4.2  | 20  | 2.91E-09 | 4.59E-08 |
| 89  | Toll Like Receptor 2 (TLR2) Cascade                                          | 81   | 4.2  | 20  | 2.91E-09 | 4.59E-08 |
| 90  | Toll Like Receptor 10 (TLR10) Cascade                                        | 74   | 3.83 | 19  | 3.61E-09 | 5.50E-08 |
| 91  | Toll Like Receptor 5 (TLR5) Cascade                                          | 74   | 3.83 | 19  | 3.61E-09 | 5.50E-08 |
| 92  | MyD88 cascade initiated on plasma membrane                                   | 74   | 3.83 | 19  | 3.61E-09 | 5.50E-08 |
| 93  | TRAF6 mediated induction of NFkB and MAP kinases upon TLR7/8 or 9 activation | 76   | 3.94 | 19  | 5.85E-09 | 8.82E-08 |
| 94  | Toll Like Receptor 7/8 (TLR7/8) Cascade                                      | 77   | 3.99 | 19  | 7.41E-09 | 1.09E-07 |
| 95  | MyD88 dependent cascade initiated on endosome                                | 77   | 3.99 | 19  | 7.41E-09 | 1.09E-07 |
| 96  | Signal Transduction                                                          | 1690 | 87.5 | 134 | 1.04E-08 | 1.51E-07 |
| 97  | Toll Like Receptor 9 (TLR9) Cascade                                          | 79   | 4.09 | 19  | 1.17E-08 | 1.69E-07 |
| 98  | Activated TLR4 signalling                                                    | 100  | 5.18 | 21  | 2.63E-08 | 3.76E-07 |
| 99  | Toll Like Receptor 4 (TLR4) Cascade                                          | 103  | 5.34 | 21  | 4.55E-08 | 6.44E-07 |
| 100 | Fcgamma receptor (FCGR) dependent phagocytosis                               | 86   | 4.46 | 19  | 5.18E-08 | 7.27E-07 |
| 101 | TRIF-mediated TLR3/TLR4 signaling                                            | 87   | 4.51 | 19  | 6.32E-08 | 8.78E-07 |
| 102 | Translocation of GLUT4 to the Plasma Membrane                                | 71   | 3.68 | 17  | 7.54E-08 | 1.04E-06 |
| 103 | MyD88-independent cascade                                                    | 88   | 4.56 | 19  | 7.69E-08 | 1.04E-06 |
| 104 | Toll Like Receptor 3 (TLR3) Cascade                                          | 88   | 4.56 | 19  | 7.69E-08 | 1.04E-06 |
| 105 | Developmental Biology                                                        | 417  | 21.6 | 48  | 8.85E-08 | 1.18E-06 |
| 106 | Axon guidance                                                                | 292  | 15.1 | 38  | 9.52E-08 | 1.26E-06 |
| 107 | RIG-I/MDA5 mediated induction of IFN-alpha/beta pathways                     | 67   | 3.47 | 16  | 1.91E-07 | 2.50E-06 |
| 108 | Innate Immune System                                                         | 521  | 27   | 54  | 4.29E-07 | 5.57E-06 |
| 109 | MAP kinase activation in TLR cascade                                         | 55   | 2.85 | 14  | 4.85E-07 | 6.24E-06 |

|     |                                                           |     |       |    |          |          |
|-----|-----------------------------------------------------------|-----|-------|----|----------|----------|
| 110 | Cytokine Signaling in Immune system                       | 286 | 14.8  | 36 | 4.90E-07 | 6.25E-06 |
| 111 | Platelet activation, signaling and aggregation            | 220 | 11.4  | 30 | 8.56E-07 | 1.08E-05 |
| 112 | Toll-Like Receptors Cascades                              | 123 | 6.37  | 21 | 1.06E-06 | 1.33E-05 |
| 113 | NF-kB is activated and signals survival                   | 13  | 0.674 | 7  | 1.24E-06 | 1.54E-05 |
| 114 | Hemostasis                                                | 511 | 26.5  | 52 | 1.28E-06 | 1.58E-05 |
| 115 | Recycling pathway of L1                                   | 44  | 2.28  | 12 | 1.45E-06 | 1.77E-05 |
| 116 | Signaling by Interleukins                                 | 116 | 6.01  | 20 | 1.64E-06 | 1.98E-05 |
| 117 | Signaling by EGFR in Cancer                               | 181 | 9.38  | 26 | 1.76E-06 | 2.11E-05 |
| 118 | Regulation of actin dynamics for phagocytic cup formation | 62  | 3.21  | 14 | 2.32E-06 | 2.76E-05 |
| 119 | Activation of the AP-1 family of transcription factors    | 10  | 0.518 | 6  | 3.26E-06 | 3.85E-05 |
| 120 | Influenza Viral RNA Transcription and Replication         | 176 | 9.12  | 25 | 3.44E-06 | 3.99E-05 |

**Supplementary Table 4:** Functional enrichment analysis of 12 down regulated genes and its network using Reactome.



|    | <b>Pathway</b>                                                               | <b>Total</b> | <b>Expected</b> | <b>Hits</b> | <b>P.Value</b> | <b>FDR</b> |
|----|------------------------------------------------------------------------------|--------------|-----------------|-------------|----------------|------------|
| 1  | Immune System                                                                | 1140         | 56.6            | 125         | 2.14E-20       | 3.00E-17   |
| 2  | Adaptive Immune System                                                       | 654          | 32.5            | 77          | 1.28E-13       | 8.99E-11   |
| 3  | Cytokine Signaling in Immune system                                          | 286          | 14.2            | 44          | 8.44E-12       | 3.94E-09   |
| 4  | Innate Immune System                                                         | 521          | 25.9            | 62          | 3.39E-11       | 1.19E-08   |
| 5  | NOTCH1 Intracellular Domain Regulates Transcription                          | 50           | 2.49            | 17          | 1.02E-10       | 2.29E-08   |
| 6  | Toll-Like Receptors Cascades                                                 | 123          | 6.12            | 26          | 1.88E-10       | 2.29E-08   |
| 7  | Constitutive Signaling by NOTCH1 HD+PEST Domain Mutants                      | 52           | 2.59            | 17          | 2.07E-10       | 2.29E-08   |
| 8  | Constitutive Signaling by NOTCH1 PEST Domain Mutants                         | 59           | 2.93            | 18          | 2.20E-10       | 2.29E-08   |
| 9  | Signaling by NOTCH1 t(7;9)(NOTCH1:M1580_K2555) Translocation Mutant          | 74           | 3.68            | 20          | 2.45E-10       | 2.29E-08   |
| 10 | Signaling by NOTCH1 in Cancer                                                | 74           | 3.68            | 20          | 2.45E-10       | 2.29E-08   |
| 11 | Signaling by NOTCH1 PEST Domain Mutants in Cancer                            | 74           | 3.68            | 20          | 2.45E-10       | 2.29E-08   |
| 12 | FBXW7 Mutants and NOTCH1 in Cancer                                           | 74           | 3.68            | 20          | 2.45E-10       | 2.29E-08   |
| 13 | Signaling by NOTCH1 HD Domain Mutants in Cancer                              | 74           | 3.68            | 20          | 2.45E-10       | 2.29E-08   |
| 14 | Signaling by NOTCH1 HD+PEST Domain Mutants in Cancer                         | 74           | 3.68            | 20          | 2.45E-10       | 2.29E-08   |
| 15 | Signaling by NOTCH1                                                          | 74           | 3.68            | 20          | 2.45E-10       | 2.29E-08   |
| 16 | Activated TLR4 signalling                                                    | 100          | 4.97            | 22          | 2.23E-09       | 1.96E-07   |
| 17 | Toll Like Receptor 4 (TLR4) Cascade                                          | 103          | 5.12            | 22          | 4.03E-09       | 3.33E-07   |
| 18 | TRIF-mediated TLR3/TLR4 signaling                                            | 87           | 4.33            | 20          | 5.44E-09       | 4.24E-07   |
| 19 | MyD88-independent cascade                                                    | 88           | 4.38            | 20          | 6.73E-09       | 4.72E-07   |
| 20 | Toll Like Receptor 3 (TLR3) Cascade                                          | 88           | 4.38            | 20          | 6.73E-09       | 4.72E-07   |
| 21 | Signalling by NGF                                                            | 290          | 14.4            | 39          | 7.97E-09       | 5.32E-07   |
| 22 | Cell Cycle                                                                   | 508          | 25.3            | 55          | 1.74E-08       | 1.11E-06   |
| 23 | Hemostasis                                                                   | 511          | 25.4            | 55          | 2.14E-08       | 1.31E-06   |
| 24 | Signaling by SCF-KIT                                                         | 142          | 7.06            | 25          | 2.27E-08       | 1.33E-06   |
| 25 | Signaling by NOTCH                                                           | 95           | 4.72            | 20          | 2.72E-08       | 1.53E-06   |
| 26 | Activation of BAD and translocation to mitochondria                          | 17           | 0.845           | 9           | 2.85E-08       | 1.54E-06   |
| 27 | Signaling by ERBB2                                                           | 164          | 8.15            | 26          | 1.09E-07       | 5.47E-06   |
| 28 | Intrinsic Pathway for Apoptosis                                              | 37           | 1.84            | 12          | 1.13E-07       | 5.47E-06   |
| 29 | Cell Cycle, Mitotic                                                          | 411          | 20.4            | 46          | 1.13E-07       | 5.47E-06   |
| 30 | Signaling by Interleukins                                                    | 116          | 5.77            | 21          | 1.92E-07       | 8.98E-06   |
| 31 | Translocation of GLUT4 to the Plasma Membrane                                | 71           | 3.53            | 16          | 2.56E-07       | 1.16E-05   |
| 32 | Signaling by ERBB4                                                           | 152          | 7.56            | 24          | 3.70E-07       | 1.62E-05   |
| 33 | Factors involved in megakaryocyte development and platelet production        | 155          | 7.71            | 24          | 5.36E-07       | 2.28E-05   |
| 34 | Signaling by FGFR in disease                                                 | 178          | 8.85            | 26          | 5.75E-07       | 2.37E-05   |
| 35 | TRAF6 mediated induction of NFkB and MAP kinases upon TLR7/8 or 9 activation | 76           | 3.78            | 16          | 6.90E-07       | 2.77E-05   |
| 36 | Toll Like Receptor 7/8 (TLR7/8) Cascade                                      | 77           | 3.83            | 16          | 8.33E-07       | 3.15E-05   |
| 37 | MyD88 dependent cascade initiated on endosome                                | 77           | 3.83            | 16          | 8.33E-07       | 3.15E-05   |

|    |                                                                                             |     |       |    |          |          |
|----|---------------------------------------------------------------------------------------------|-----|-------|----|----------|----------|
| 38 | Activation of BH3-only proteins                                                             | 24  | 1.19  | 9  | 1.12E-06 | 4.08E-05 |
| 39 | MHC class II antigen presentation                                                           | 118 | 5.87  | 20 | 1.13E-06 | 4.08E-05 |
| 40 | Toll Like Receptor 9 (TLR9) Cascade                                                         | 79  | 3.93  | 16 | 1.20E-06 | 4.08E-05 |
| 41 | Signaling by TGF-beta Receptor Complex                                                      | 70  | 3.48  | 15 | 1.22E-06 | 4.08E-05 |
| 42 | Signaling by FGFR                                                                           | 162 | 8.06  | 24 | 1.22E-06 | 4.08E-05 |
| 43 | Downstream signal transduction                                                              | 163 | 8.1   | 24 | 1.37E-06 | 4.47E-05 |
| 44 | SOS-mediated signalling                                                                     | 14  | 0.696 | 7  | 1.79E-06 | 5.70E-05 |
| 45 | S Phase                                                                                     | 122 | 6.07  | 20 | 1.95E-06 | 5.96E-05 |
| 46 | Nucleotide-binding domain, leucine rich repeat containing receptor (NLR) signaling pathways | 55  | 2.73  | 13 | 1.96E-06 | 5.96E-05 |
| 47 | Toll Like Receptor 10 (TLR10) Cascade                                                       | 74  | 3.68  | 15 | 2.57E-06 | 7.24E-05 |
| 48 | Toll Like Receptor 5 (TLR5) Cascade                                                         | 74  | 3.68  | 15 | 2.57E-06 | 7.24E-05 |
| 49 | MyD88 cascade initiated on plasma membrane                                                  | 74  | 3.68  | 15 | 2.57E-06 | 7.24E-05 |
| 50 | G2/M Checkpoints                                                                            | 48  | 2.39  | 12 | 2.58E-06 | 7.24E-05 |
| 51 | Signaling by EGFR in Cancer                                                                 | 181 | 9     | 25 | 2.74E-06 | 7.53E-05 |
| 52 | Activation of ATR in response to replication stress                                         | 41  | 2.04  | 11 | 3.21E-06 | 8.49E-05 |
| 53 | Kinesins                                                                                    | 41  | 2.04  | 11 | 3.21E-06 | 8.49E-05 |
| 54 | Mitotic G2-G2/M phases                                                                      | 105 | 5.22  | 18 | 3.33E-06 | 8.63E-05 |
| 55 | G0 and Early G1                                                                             | 27  | 1.34  | 9  | 3.53E-06 | 8.99E-05 |
| 56 | RIG-I/MDA5 mediated induction of IFN-alpha/beta pathways                                    | 67  | 3.33  | 14 | 3.81E-06 | 9.55E-05 |
| 57 | Disease                                                                                     | 945 | 47    | 77 | 3.89E-06 | 9.57E-05 |
| 58 | Mitotic G1-G1/S phases                                                                      | 140 | 6.96  | 21 | 4.71E-06 | 0.000114 |
| 59 | Signaling by the B Cell Receptor (BCR)                                                      | 199 | 9.89  | 26 | 4.94E-06 | 0.000117 |
| 60 | DAP12 signaling                                                                             | 164 | 8.15  | 23 | 5.34E-06 | 0.000125 |
| 61 | TAK1 activates NFkB by phosphorylation and activation of IKKs complex                       | 22  | 1.09  | 8  | 5.95E-06 | 0.000137 |
| 62 | Signaling by PDGF                                                                           | 189 | 9.4   | 25 | 6.05E-06 | 0.000137 |
| 63 | TRAF6 Mediated Induction of proinflammatory cytokines                                       | 62  | 3.08  | 13 | 8.16E-06 | 0.000175 |
| 64 | MyD88:Mal cascade initiated on plasma membrane                                              | 81  | 4.03  | 15 | 8.35E-06 | 0.000175 |
| 65 | Toll Like Receptor TLR1:TLR2 Cascade                                                        | 81  | 4.03  | 15 | 8.35E-06 | 0.000175 |
| 66 | Toll Like Receptor TLR6:TLR2 Cascade                                                        | 81  | 4.03  | 15 | 8.35E-06 | 0.000175 |
| 67 | Toll Like Receptor 2 (TLR2) Cascade                                                         | 81  | 4.03  | 15 | 8.35E-06 | 0.000175 |
| 68 | G2/M Transition                                                                             | 102 | 5.07  | 17 | 9.25E-06 | 0.000191 |
| 69 | NOD1/2 Signaling Pathway                                                                    | 38  | 1.89  | 10 | 1.10E-05 | 0.000223 |
| 70 | Interferon gamma signaling                                                                  | 74  | 3.68  | 14 | 1.29E-05 | 0.000257 |
| 71 | Downstream Signaling Events Of B Cell Receptor (BCR)                                        | 173 | 8.6   | 23 | 1.32E-05 | 0.000257 |
| 72 | Interferon Signaling                                                                        | 173 | 8.6   | 23 | 1.32E-05 | 0.000257 |
| 73 | TCR signaling                                                                               | 65  | 3.23  | 13 | 1.41E-05 | 0.000269 |
| 74 | Downstream signaling of activated FGFR                                                      | 150 | 7.46  | 21 | 1.42E-05 | 0.000269 |
| 75 | p75 NTR receptor-mediated signalling                                                        | 85  | 4.23  | 15 | 1.54E-05 | 0.000287 |
| 76 | Downstream TCR signaling                                                                    | 48  | 2.39  | 11 | 1.68E-05 | 0.000308 |
| 77 | Activation of the pre-replicative complex                                                   | 32  | 1.59  | 9  | 1.69E-05 | 0.000308 |

|     |                                                                   |      |       |     |          |          |
|-----|-------------------------------------------------------------------|------|-------|-----|----------|----------|
| 78  | DAI mediated induction of type I IFNs                             | 13   | 0.646 | 6   | 1.84E-05 | 0.000327 |
| 79  | AKT phosphorylates targets in the cytosol                         | 13   | 0.646 | 6   | 1.84E-05 | 0.000327 |
| 80  | Cytosolic sensors of pathogen-associated DNA                      | 19   | 0.945 | 7   | 2.12E-05 | 0.000371 |
| 81  | Cell Cycle Checkpoints                                            | 131  | 6.51  | 19  | 2.20E-05 | 0.000381 |
| 82  | Signaling by EGFR                                                 | 179  | 8.9   | 23  | 2.32E-05 | 0.000397 |
| 83  | Chemokine receptors bind chemokines                               | 59   | 2.93  | 12  | 2.53E-05 | 0.000427 |
| 84  | Cyclin B2 mediated events                                         | 5    | 0.249 | 4   | 2.89E-05 | 0.000482 |
| 85  | NGF signalling via TRKA from the plasma membrane                  | 207  | 10.3  | 25  | 3.00E-05 | 0.000495 |
| 86  | DAPI2 interactions                                                | 182  | 9.05  | 23  | 3.04E-05 | 0.000496 |
| 87  | GRB2 events in EGFR signaling                                     | 14   | 0.696 | 6   | 3.09E-05 | 0.000498 |
| 88  | Apoptosis                                                         | 158  | 7.86  | 21  | 3.17E-05 | 0.000505 |
| 89  | IRS-related events triggered by IGF1R                             | 91   | 4.52  | 15  | 3.57E-05 | 0.000562 |
| 90  | G1/S Transition                                                   | 113  | 5.62  | 17  | 3.70E-05 | 0.000576 |
| 91  | SHC1 events in EGFR signaling                                     | 15   | 0.746 | 6   | 4.93E-05 | 0.00076  |
| 92  | Signaling by Type 1 Insulin-like Growth Factor 1 Receptor (IGF1R) | 94   | 4.67  | 15  | 5.28E-05 | 0.000796 |
| 93  | IGF1R signaling cascade                                           | 94   | 4.67  | 15  | 5.28E-05 | 0.000796 |
| 94  | Interleukin-1 signaling                                           | 45   | 2.24  | 10  | 5.42E-05 | 0.000808 |
| 95  | Centrosome maturation                                             | 86   | 4.28  | 14  | 7.49E-05 | 0.00107  |
| 96  | Recruitment of mitotic centrosome proteins and complexes          | 86   | 4.28  | 14  | 7.49E-05 | 0.00107  |
| 97  | G1/S-Specific Transcription                                       | 16   | 0.796 | 6   | 7.57E-05 | 0.00107  |
| 98  | p75NTR signals via NF-kB                                          | 16   | 0.796 | 6   | 7.57E-05 | 0.00107  |
| 99  | TRAF6 mediated NF-kB activation                                   | 16   | 0.796 | 6   | 7.57E-05 | 0.00107  |
| 100 | Developmental Biology                                             | 417  | 20.7  | 39  | 8.15E-05 | 0.00114  |
| 101 | IRS-mediated signalling                                           | 87   | 4.33  | 14  | 8.53E-05 | 0.00118  |
| 102 | RIP-mediated NFkB activation via DAI                              | 11   | 0.547 | 5   | 0.000106 | 0.00146  |
| 103 | Interferon alpha/beta signaling                                   | 68   | 3.38  | 12  | 0.00011  | 0.00148  |
| 104 | Constitutive PI3K/AKT Signaling in Cancer                         | 89   | 4.43  | 14  | 0.00011  | 0.00148  |
| 105 | Rap1 signalling                                                   | 17   | 0.845 | 6   | 0.000112 | 0.0015   |
| 106 | Mitotic M-M/G1 phases                                             | 266  | 13.2  | 28  | 0.000122 | 0.0016   |
| 107 | Inhibition of TSC complex formation by PKB                        | 3    | 0.149 | 3   | 0.000122 | 0.0016   |
| 108 | IRS-related events                                                | 90   | 4.48  | 14  | 0.000124 | 0.00162  |
| 109 | SHC1 events in ERBB2 signaling                                    | 25   | 1.24  | 7   | 0.000156 | 0.00199  |
| 110 | IKK complex recruitment mediated by RIP1                          | 25   | 1.24  | 7   | 0.000156 | 0.00199  |
| 111 | Signal Transduction                                               | 1690 | 83.9  | 113 | 0.00016  | 0.00202  |
| 112 | SHC-related events triggered by IGF1R                             | 18   | 0.895 | 6   | 0.000161 | 0.00202  |
| 113 | Transcriptional activity of SMAD2/SMAD3:SMAD4 heterotrimer        | 43   | 2.14  | 9   | 0.000209 | 0.0026   |
| 114 | Insulin receptor signalling cascade                               | 95   | 4.72  | 14  | 0.000225 | 0.00275  |
| 115 | Signaling by constitutively active EGFR                           | 19   | 0.945 | 6   | 0.000226 | 0.00275  |
| 116 | E2F mediated regulation of DNA replication                        | 35   | 1.74  | 8   | 0.000248 | 0.003    |
| 117 | Downregulation of ERBB2:ERBB3 signaling                           | 13   | 0.646 | 5   | 0.000273 | 0.00327  |
| 118 | Post-chaperonin tubulin folding pathway                           | 20   | 0.994 | 6   | 0.000309 | 0.00363  |

|     |                                                                                       |    |      |    |          |         |
|-----|---------------------------------------------------------------------------------------|----|------|----|----------|---------|
| 119 | Loss of proteins required for interphase microtubule organization from the centrosome | 65 | 3.23 | 11 | 0.000311 | 0.00363 |
| 120 | Loss of Nlp from mitotic centrosomes                                                  | 65 | 3.23 | 11 | 0.000311 | 0.00363 |

**Supplementary Table 5:** Functional enrichment analysis of 19 up-regulated genes and its network using Reactome.

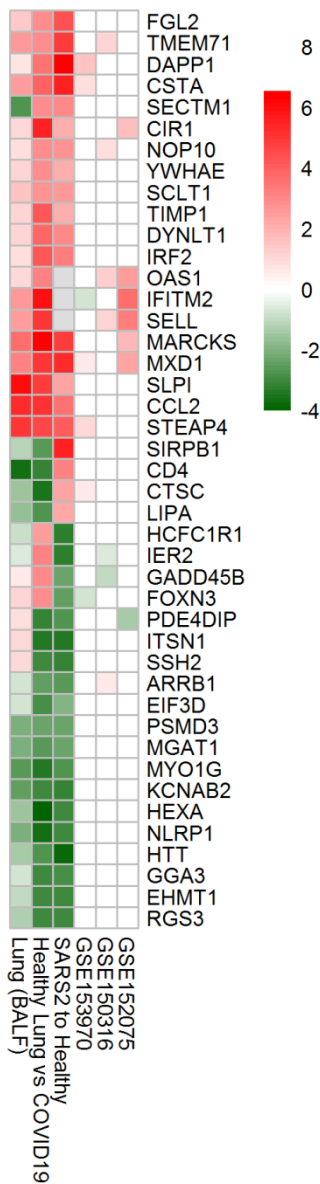

**Supplementary Figure 1: Expression status of 43 share genes identified in Figure 3e in three independent validation datasets from SARS-CoV2 infected patient specimens.** Expression levels of the 43 genes found differentially expressed in COVID19 patients were validated in other datasets from Gene expression Omnibus (Accessions: GSE153970, GSE150316, GSE152075). Genes followed the statistical thresholds as per Fig 3e, 15 out of 43 were observed as following the similar pattern of expression
